# Supplementary material
Source: Royal Society of Chemistry journal article supplement (doi:10.1039/d6ay00449k)
Supplement: d6ay00449k1.pdf [file d6ay00449k1.pdf]

## Supplementary Information

### Hexafluoroisopropanol-induced salt-free catanionic surfactant supramolecular solvent for direct immersion single-drop microextraction of sulfonamides and fluoroquinolones in water samples

Keke Huang <sup>†, a,b</sup>, Jia Chen <sup>†, c,d</sup>, Wending Yao <sup>e</sup>, Xiao Li <sup>\*,a,b</sup>

<sup>a</sup> *Department of Clinical Pharmacy, the First Affiliated Hospital, Zhejiang University School of Medicine, Hangzhou 310003, China*

<sup>b</sup> *Zhejiang Provincial Key Laboratory for Drug Evaluation and Clinical Research, Hangzhou 310003, China*

<sup>c</sup> *Key Laboratory of Structural Biology of Zhejiang Province, School of Life Sciences, Westlake University, Hangzhou 310024, China.*

<sup>d</sup> *Mass Spectrometry & Metabolomics Core Facility, The Biomedical Research Core Facility, Westlake University, Hangzhou 310024, China*

<sup>e</sup> *School of Pharmacy, Hangzhou Medical College, Hangzhou 310053, China*

\* Corresponding authors. E-mail addresses: 1321290@zju.edu.cn (Xiao Li).

† These authors contributed equally to this work.

**Page number:** Page S1–S15

**Figure number:** Fig. S1–S11

**Table number:** Table S1–S3

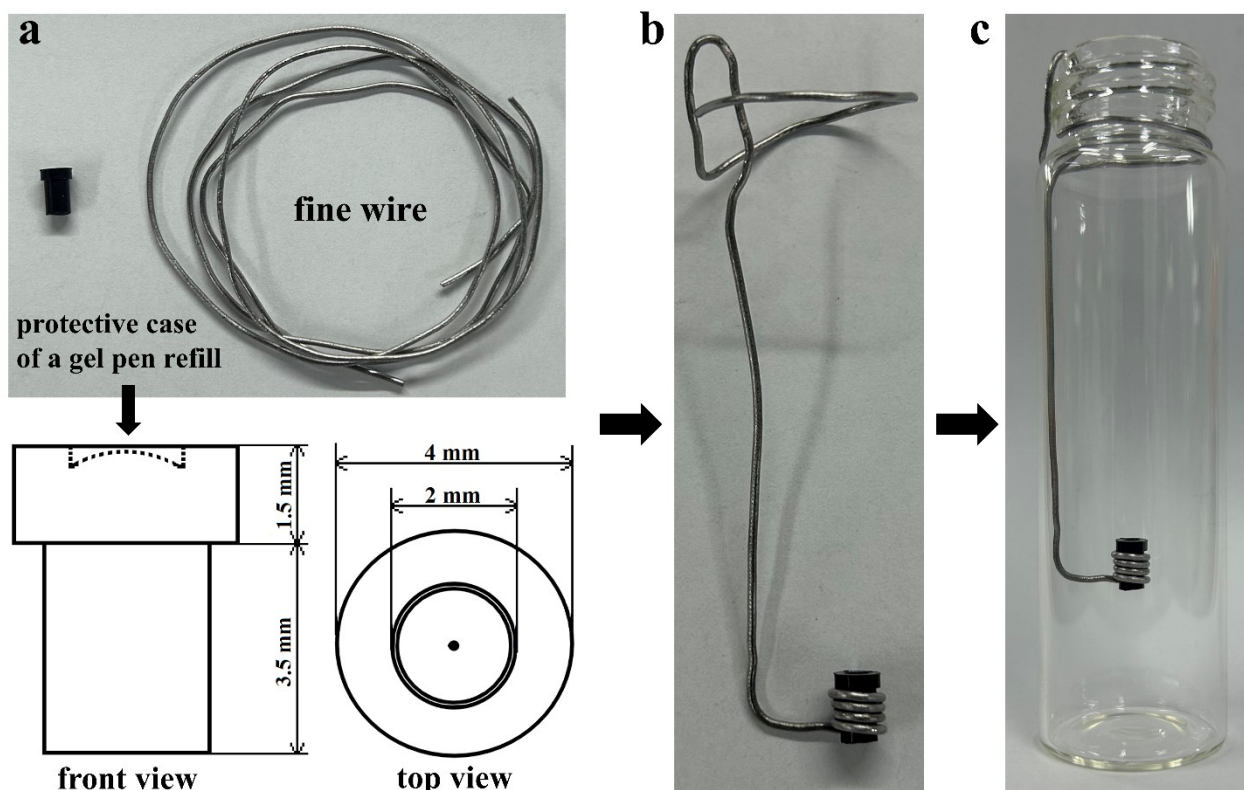

**Fig. S1.** Schematic and photographic illustration of the homemade droplet holder fabrication. (a) Schematic diagram showing the dimensions of the gel pen refill case, alongside the raw materials (pen refill case and fine wire); (b) The holder after wrapping with fine wire and forming the suspension hook; (c) The final assembly of the holder inside the sample vial.

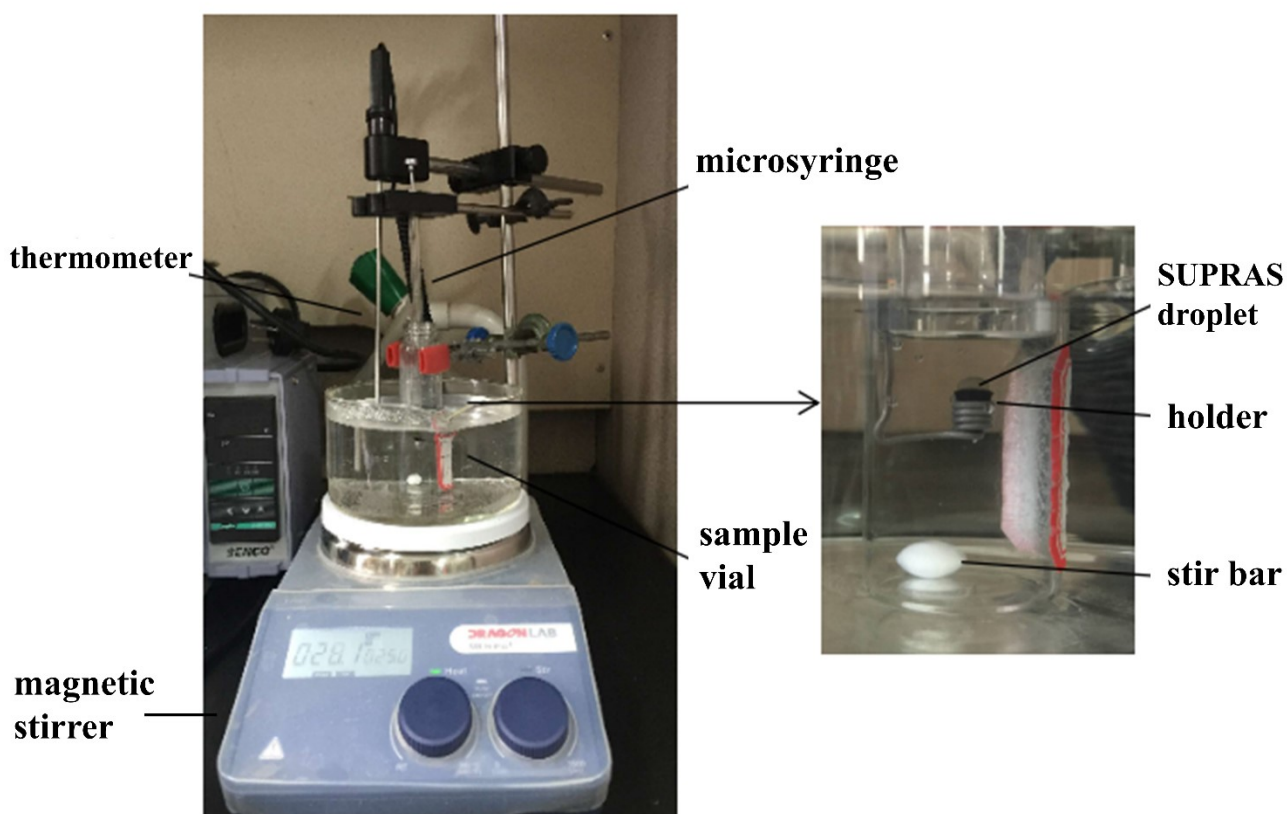

**Fig. S2.** Photograph of the experimental setup. The overall setup includes a magnetic stirrer, water bath, sample vial, microsyringe, and thermometer. The inset shows the SUPRAS single droplet supported by the homemade holder, along with the stir bar inside the vial.

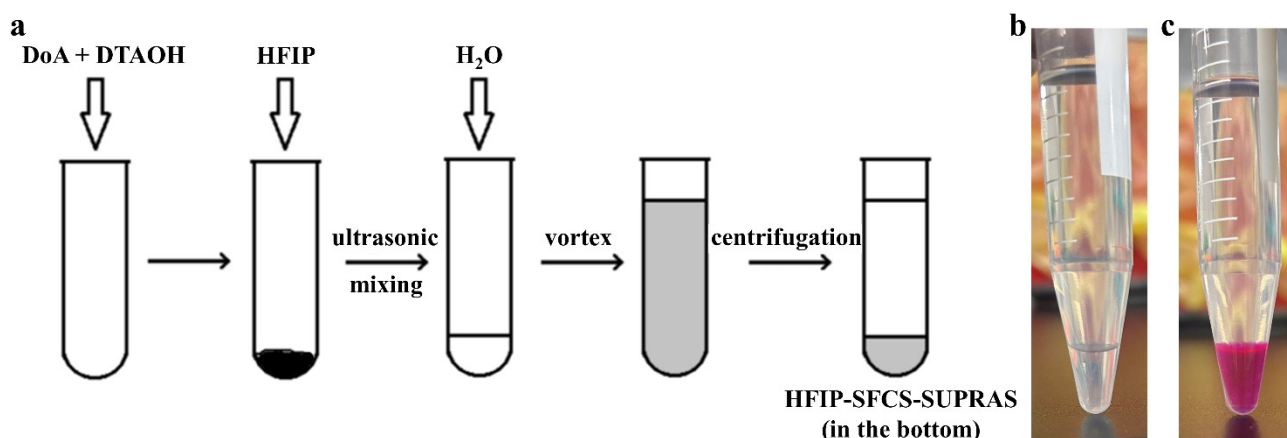

**Fig. S3.** Preparation and visualization of HFIP-SFCS-SUPRAS. (a) Schematic of the synthesis procedure; (b) Photograph of the phase-separated SUPRAS; (c) Nile red-stained SUPRAS for visual confirmation. Conditions: DoA/DTAOH = 7:3 (mol/mol), total surfactant concentration = 100 mM, HFIP = 10% (v/v).

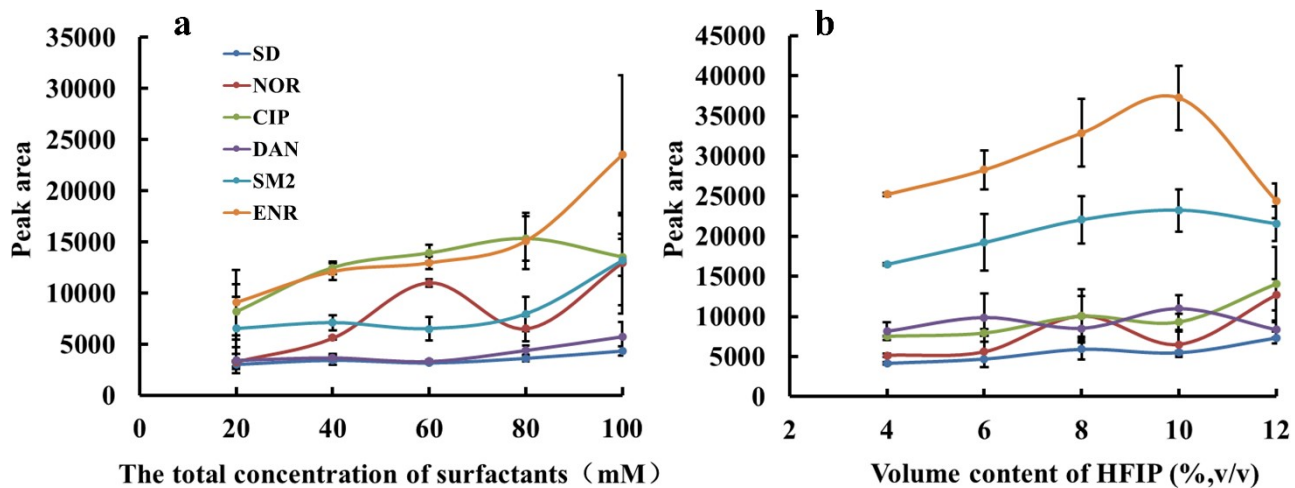

**Fig. S4.** Effects of total surfactant concentration (a) and HFIP content (b) on peak area of SAs and FQs. Conditions: extraction temperature = 25°C, stirring rate = 300 rpm, extraction time = 20 min, drop volume = 20  $\mu$ L (a) DoA/DTAOH = 1:1 (mol/mol), HFIP = 10% (v/v); (b) DoA/DTAOH = 1:1 (mol/mol), total surfactant concentration = 100 mM.

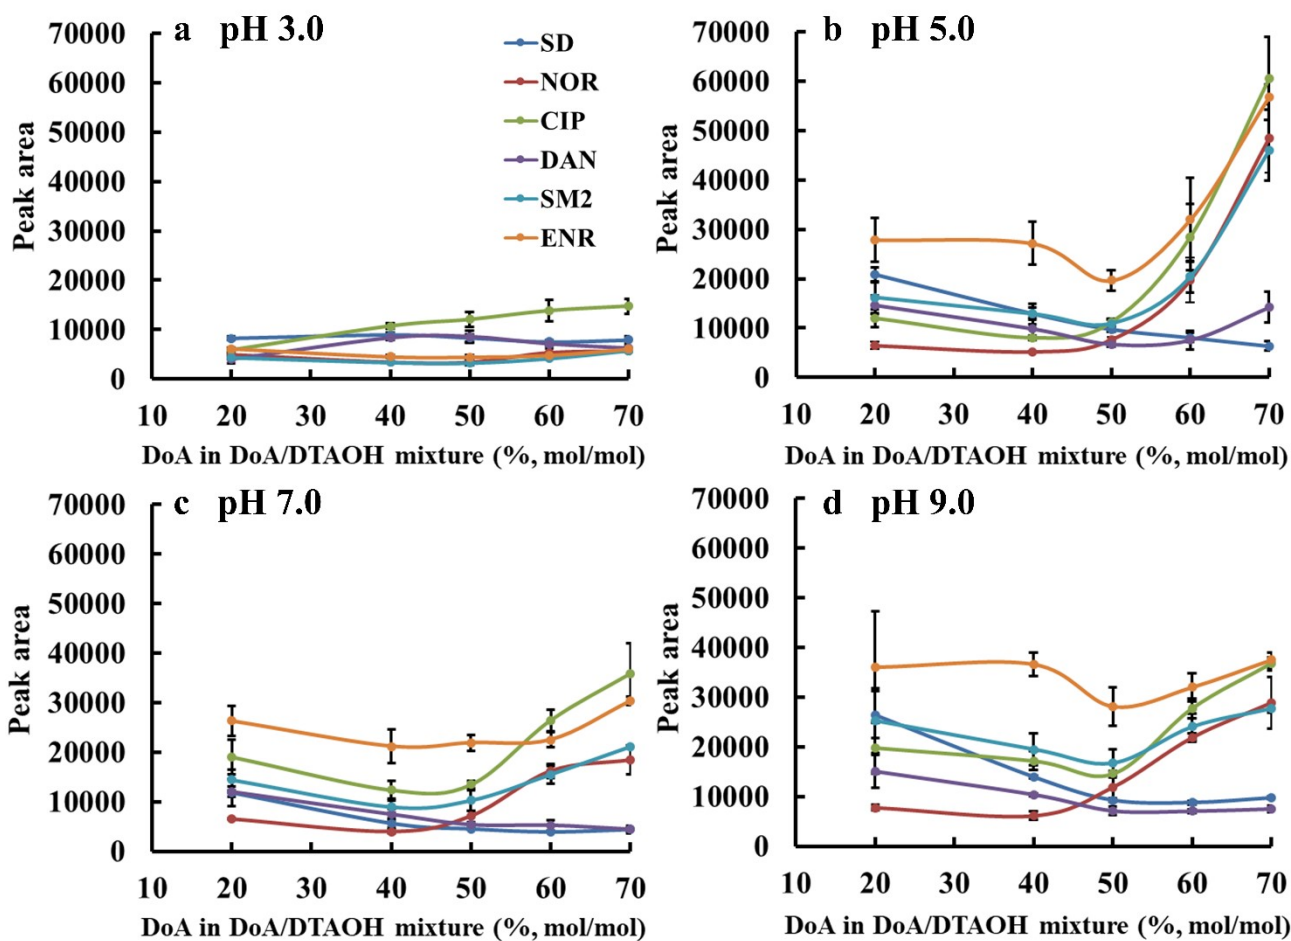

**Fig. S5.** Effects of DoA/DTAOH molar ratio and sample pH 3.0 (a), 5.0 (b), 7.0 (c), 9.0 (d) on peak area of SAs and FQs. Conditions: total surfactant concentration = 40 mM, HFIP = 10% (v/v), extraction temperature = 25°C, stirring rate = 300 rpm, extraction time = 20 min, drop volume = 20  $\mu$ L.

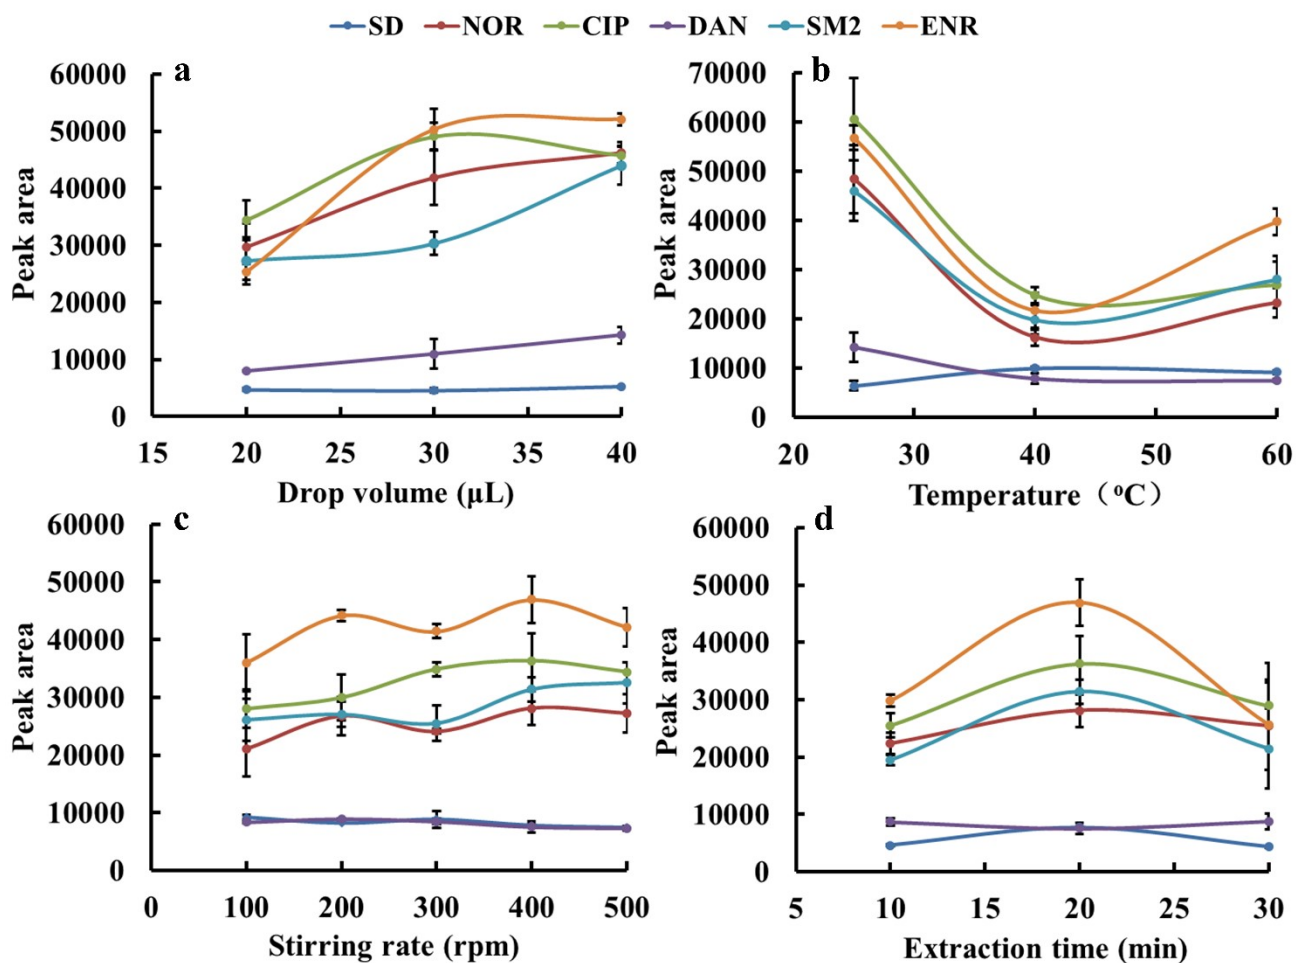

Fig. S6. Effects of drop volume (a), temperature (b), stirring rate (c) and extraction time (d) on peak area of SAs and FQs. Conditions: DoA/DTAOH = 1:1 (mol:mol), HFIP = 10% (v/v), total surfactant concentration = 100 mM.

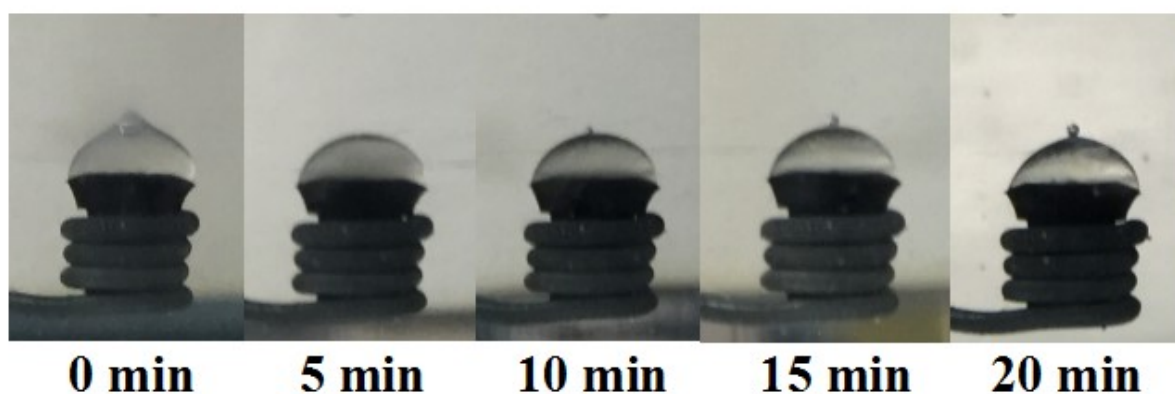

Fig. S7. The droplet on the base with different extraction times.

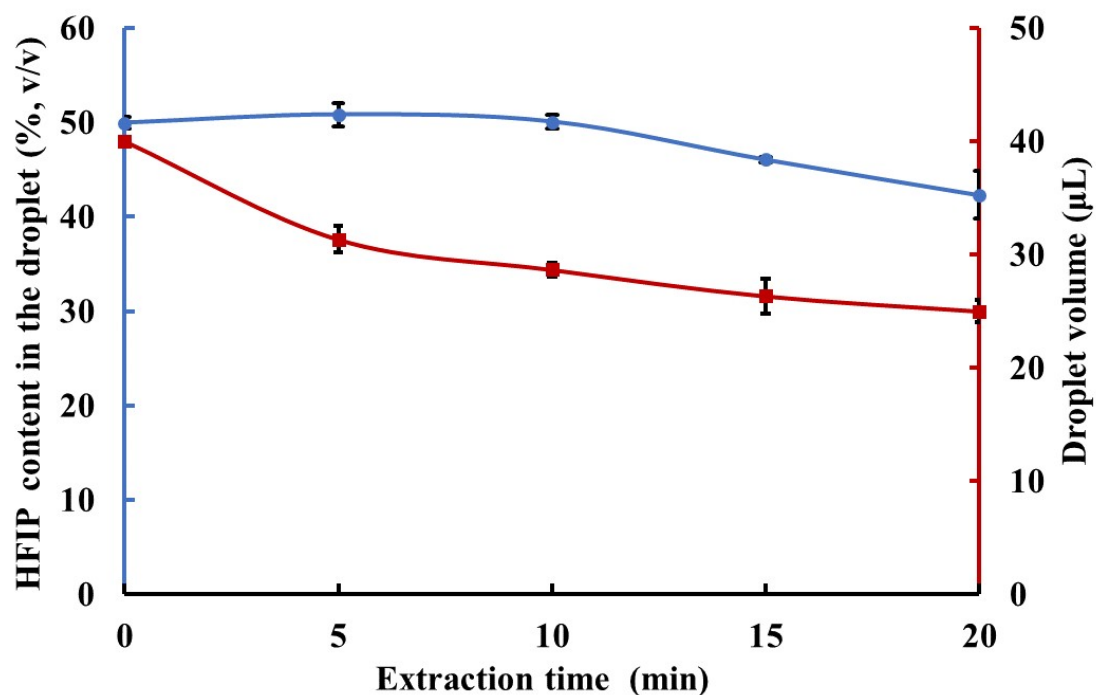

Fig. S8. SUPRAS droplet volume and HFIP content in the droplet with different extraction times.

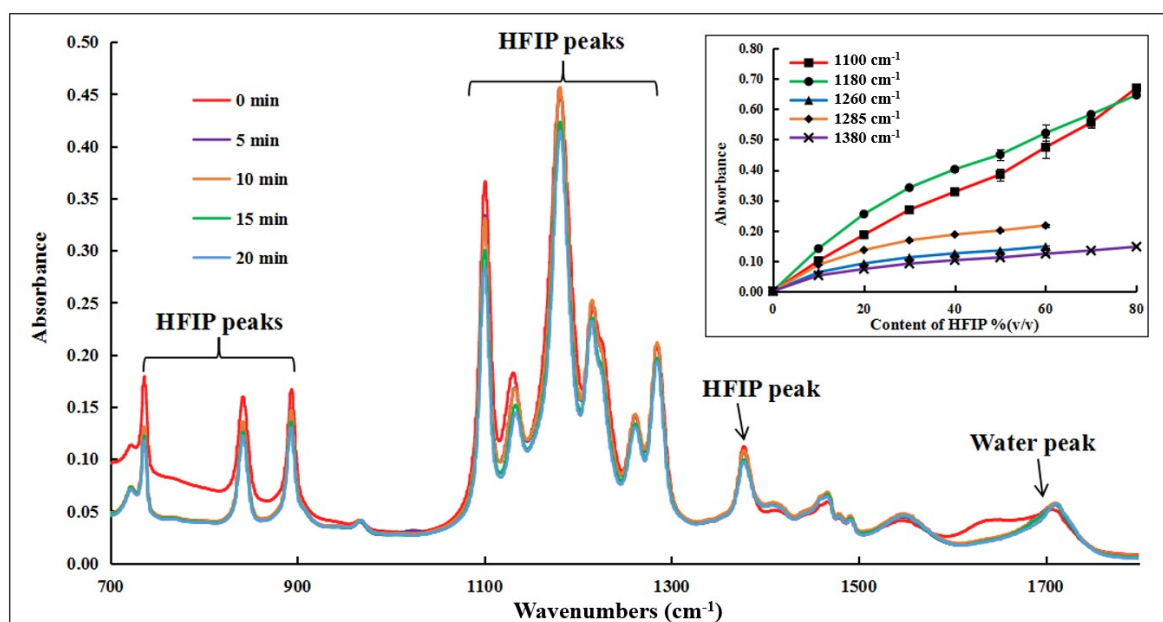

Fig. S9. ATR-FTIR spectra of the SUPRAS droplet with different extraction times. Calibration curves (inset) were made from the spectra of HFIP–water mixed solutions. The peaks at 1100, 1180, 1260, 1285, and 1380  $\text{cm}^{-1}$  gave the most linear responses. Due to the high response and good correlation coefficient, the peak at 1180  $\text{cm}^{-1}$  was chosen to quantify the HFIP content.

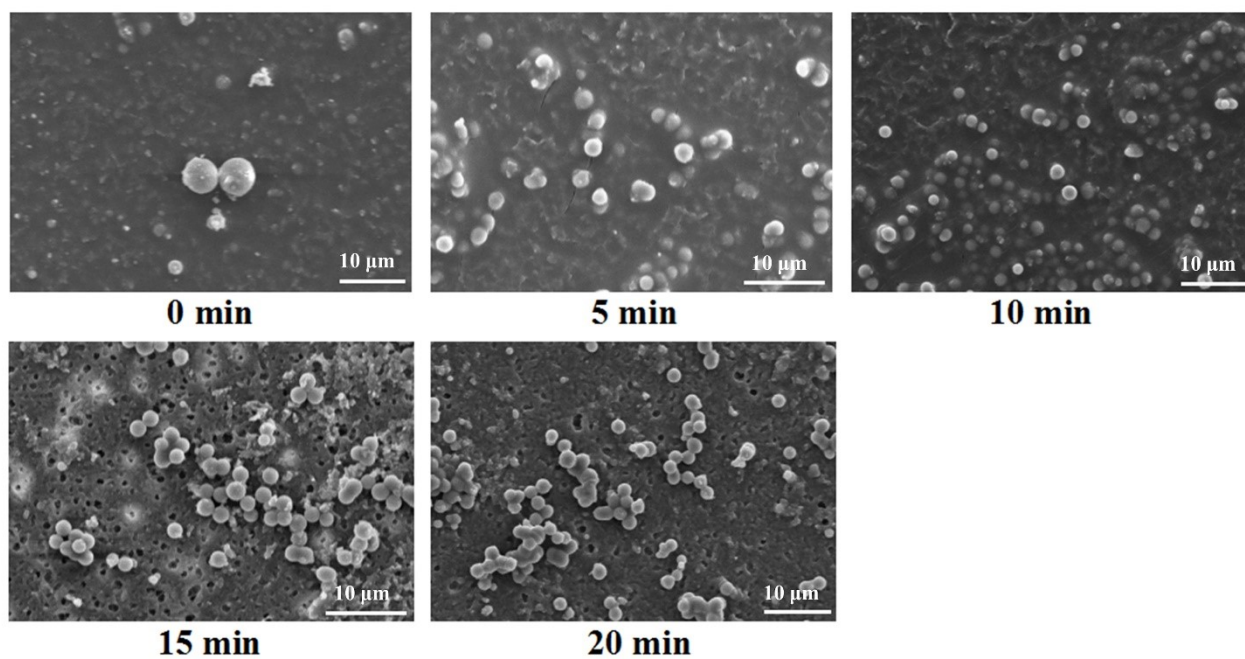

**Fig. S10.** Cryo-SEM images for HFIP-SFCS-SUPRAS droplet with different extraction times.

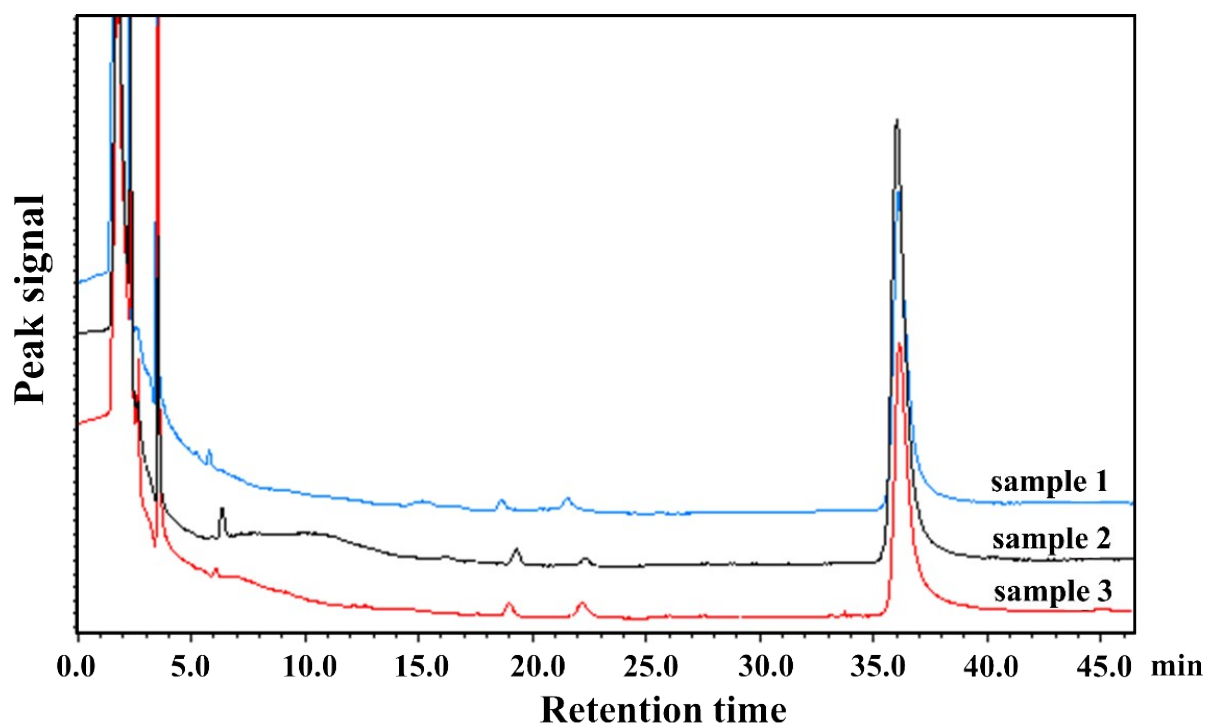

**Fig. S11.** Chromatograms for the determination of SAs and FQs in three lake water samples.

**Table S1** Chemical structures and physical properties of studied analytes.

| Analyte                           | CAS number  | Chemical structure                                                                   | Molecular weight <sup>a</sup> | pKa <sup>a</sup>           | Log P <sup>a</sup> | HBA/HBD <sup>a,b</sup> |
|-----------------------------------|-------------|--------------------------------------------------------------------------------------|-------------------------------|----------------------------|--------------------|------------------------|
| Sulfadiazine (SD)                 | 68-35-9     | 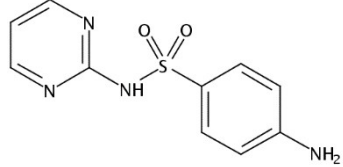   | 250.28                        | 1.64 ± 0.10<br>6.81 ± 0.10 | -0.074 ± 0.255     | 6/3                    |
| Sulfamethazine (SM <sub>2</sub> ) | 57-68-1     |    | 278.33                        | 1.69 ± 0.10<br>7.89 ± 0.10 | 0.296 ± 0.278      | 6/3                    |
| Norfloxacin (NOR)                 | 70458-96-7  |    | 319.33                        | 0.16 ± 0.20<br>8.68 ± 0.10 | 1.744 ± 0.831      | 6/2                    |
| Ciprofloxacin (CIP)               | 85721-33-1  |   | 331.34                        | 6.43 ± 0.41<br>8.68 ± 0.10 | 1.625 ± 0.831      | 6/2                    |
| Danofloxacin (DAN)                | 112398-08-0 |  | 357.38                        | 6.43 ± 0.41<br>9.00 ± 0.20 | 1.811 ± 0.909      | 6/1                    |

|                       |            |                                                                                    |        |                            |               |     |
|-----------------------|------------|------------------------------------------------------------------------------------|--------|----------------------------|---------------|-----|
| Enrofloxacin<br>(ENR) | 93106-60-6 | 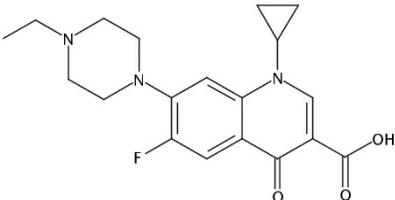 | 359.39 | 6.43 ± 0.41<br>7.76 ± 0.10 | 2.306 ± 0.819 | 6/1 |
|-----------------------|------------|------------------------------------------------------------------------------------|--------|----------------------------|---------------|-----|

<sup>a</sup> The data comes from SciFinder Scholar from Chemical Abstract Service-predicted properties.

<sup>b</sup> HBA = Hydrogen bond acceptor, HBD = Hydrogen bond donor.

**Table S2** Regression equations and coefficients for all HFIP peaks.

| Wavenumber (cm <sup>-1</sup> ) | Standard curve                            |
|--------------------------------|-------------------------------------------|
| 1100                           | $y = 0.0077x + 0.0271$ ( $R^2 = 0.9942$ ) |
| 1180                           | $y = 0.0074x + 0.0805$ ( $R^2 = 0.9822$ ) |
| 1260                           | $y = 0.0018x + 0.0460$ ( $R^2 = 0.9312$ ) |
| 1285                           | $y = 0.0029x + 0.0589$ ( $R^2 = 0.9586$ ) |
| 1380                           | $y = 0.0014x + 0.0420$ ( $R^2 = 0.9825$ ) |

**Table S3** Assessment of the greenness of the proposed method and other methods using AGREEprep metric tool.

| Method                   | Sample preparation placement | Hazardous materials                                                                        | Sustainability, renewability, and reusability of materials                             | Waste                                                                     | Size economy of the sample | Sample throughput, h <sup>-1</sup> |
|--------------------------|------------------------------|--------------------------------------------------------------------------------------------|----------------------------------------------------------------------------------------|---------------------------------------------------------------------------|----------------------------|------------------------------------|
| SALLME                   | EX-situ                      | 1.4 mL ACN                                                                                 | <25% of reagents and materials are sustainable or renewable, but can only be used once | ~30 g (water, extraction solvent, ammo-nium sulfate, tubes, pipette tips) | 18 mL                      | 3.5                                |
| DLLME                    | EX-situ                      | 685 $\mu$ L CHCl <sub>3</sub> , 1.25 mL of ACN                                             | <25% of reagents and materials are sustainable or renewable, but can only be used once | ~10 g (water, extraction solvent, tubes, pipette tips)                    | 5 mL                       | ~2.6                               |
| HDES-LLME                | EX-situ                      | 174 $\mu$ L HDES, 200 $\mu$ L MeOH                                                         | <25% of reagents and materials are sustainable or renewable, but can only be used once | ~5.4 g (water, HDES, MeOH, tubes, pipette tips)                           | 5 mL                       | 10                                 |
| MOF@COF-ptSPE            | EX-situ                      | ~3 mL ACN                                                                                  | Materials are not sustainable or renewable, but are used several times                 | ~5 g (water, ACN, MOF@COF, pipette tips)                                  | 2 mL                       | ~2.3                               |
| PSB-SPME                 | EX-situ                      | 180 $\mu$ L MeOH/AA, 70 $\mu$ L nitrite, 90 $\mu$ L HCl, 120 $\mu$ L NaOH, 60 $\mu$ L TTFA | <25% of reagents and materials are sustainable or renewable, but can only be used once | ~50 g (water, fiber, desorption solution, derivatization reagents)        | 50 mL                      | ~1.4                               |
| MIP-HFM                  | EX-situ                      | 5.4 mL MeOH, 8 $\mu$ L FA                                                                  | Materials are not sustainable or renewable, but are used several times                 | ~3 g (water, fiber, MeOH)                                                 | 0.8 mL                     | 1                                  |
| dt-MIP-DSPE              | EX-situ                      | 150 $\mu$ L MeOH/AA                                                                        | <25% of reagents and materials are sustainable or renewable, but can only be used once | ~10 g (water, sorbent, MeOH, AA, tubes, pipette tips)                     | 10 mL                      | ~0.3                               |
| MCMPs-MSPE               | EX-situ                      | 500 $\mu$ L MeOH/FA (99/1, v/v)                                                            | Materials are not sustainable or renewable, but are used several times                 | ~50 g (water, sorbent, desorption solvent, tubes, pipette tips)           | 50 mL                      | 5                                  |
| WDMPM-DSPE               | EX-situ                      | 3 mL MeOH/FA (95/5, v/v)                                                                   | Materials are not sustainable or renewable, but are used several times                 | ~23 g (water, sorbent, desorption solvent, tubes, pipette tips)           | 20 mL                      | ~0.9                               |
| HFIP-SFCS-SUPRAS-DI-SDME | EX-situ                      | 40 $\mu$ L SUPRAS                                                                          | Materials are not sustainable or renewable, but are used several times                 | ~20 g (water, SUPRAS)                                                     | 20 mL                      | 3                                  |

**Continued**

| Method        | Integration and automation                                                                  | Energy consumption | Post-sample preparation configuration for analysis | Operator's safety                                  | Circle diagram                                                                        | Ref. |
|---------------|---------------------------------------------------------------------------------------------|--------------------|----------------------------------------------------|----------------------------------------------------|---------------------------------------------------------------------------------------|------|
| SALLME        | Manual systems with 2 steps (mixing, phase separation)                                      | <10 Wh             | HPLC-UV                                            | 1 hazard (ACN)                                     | 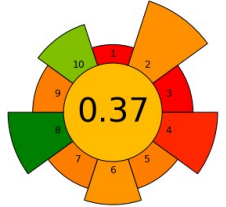   | 34   |
| DLLME         | Manual systems with more than 4 steps (vortex, centrifugation, evaporation, reconstitution) | ~50 Wh             | UHPLC-DAD                                          | 2 hazards (CHCl <sub>3</sub> , ACN)                |    | 35   |
| HDES-LLME     | Manual systems with 3 steps (vortex, standing, dilution)                                    | <10 Wh             | HPLC-UV                                            | 3 hazards (1-octanol, N <sub>8881</sub> -Cl, MeOH) |   | 36   |
| MOF@COF-ptSPE | Manual systems with 4 steps (condition, loading, elution, washing)                          | <10 Wh             | HPLC-UV                                            | 1 hazard (ACN)                                     |  | 37   |

|             |                                                                                                                                |         |            |                                                |                                                                                       |    |
|-------------|--------------------------------------------------------------------------------------------------------------------------------|---------|------------|------------------------------------------------|---------------------------------------------------------------------------------------|----|
| PSB-SPME    | Manual systems with 3 steps (extraction, desorption, derivatization)                                                           | ~15 Wh  | FO-LADS    | 6 hazards (MeOH, AA, nitrite, HCl, NaOH, TTFA) | 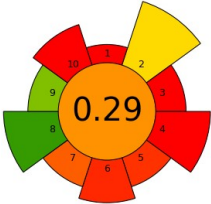   | 38 |
| MIP-HFM     | Manual systems with 5 steps (condition, extraction, washing, desorption, dilution)                                             | ~30 Wh  | HPLC-MS/MS | 2 hazards (MeOH, FA)                           |    | 39 |
| dt-MIP-DSPE | Manual systems with 6 steps (ultrasonication, extraction, centrifugation, vacuum drying, desorption, centrifugation)           | ~270 Wh | HPLC-DAD   | 2 hazards (MeOH, AA)                           |    | 40 |
| MCMPs-MSPE  | Manual systems with more than 3 steps (activation, adsorption, desorption)                                                     | ~10 Wh  | HPLC-DAD   | 2 hazards (MeOH, FA)                           |   | 41 |
| WDMPM-DSPE  | Manual systems with 7 steps (extraction, centrifugation, evaporation, desorption, centrifugation, evaporation, reconstitution) | ~100 Wh | HPLC-MS/MS | 2 hazards (MeOH, FA)                           |  | 42 |

HFIP-SFCS-SUPRAS-  
DI-SDME

Manual systems with 1 step (extraction)

<10 Wh

HPLC-UV

3 hazards (DoA,  
DTAOH, HFIP)

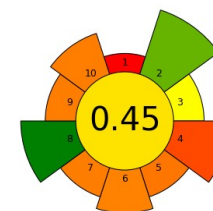

This  
work

---
